# Supplementary material
Source: MDPI journal article supplement (https://www.mdpi.com/2073-4468/8/4/54)
Supplement: s1 [file s1]

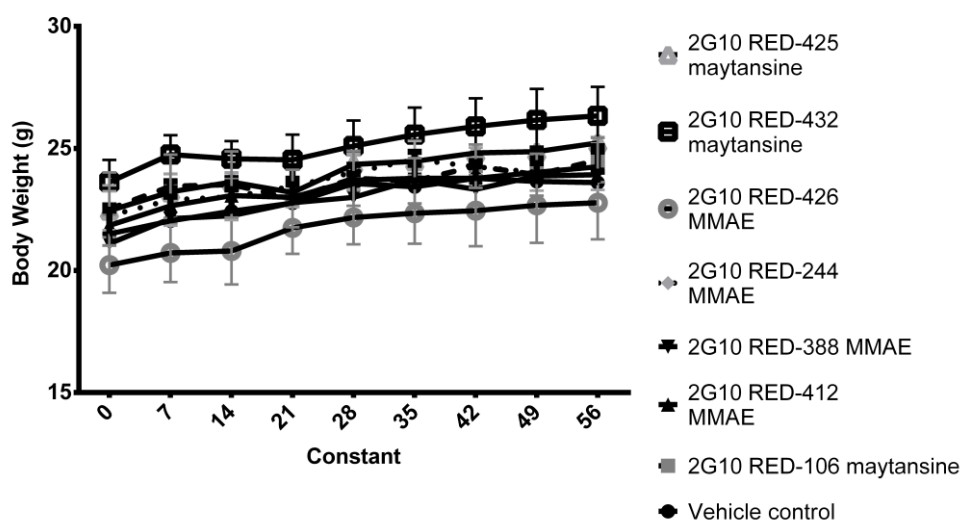

(a)

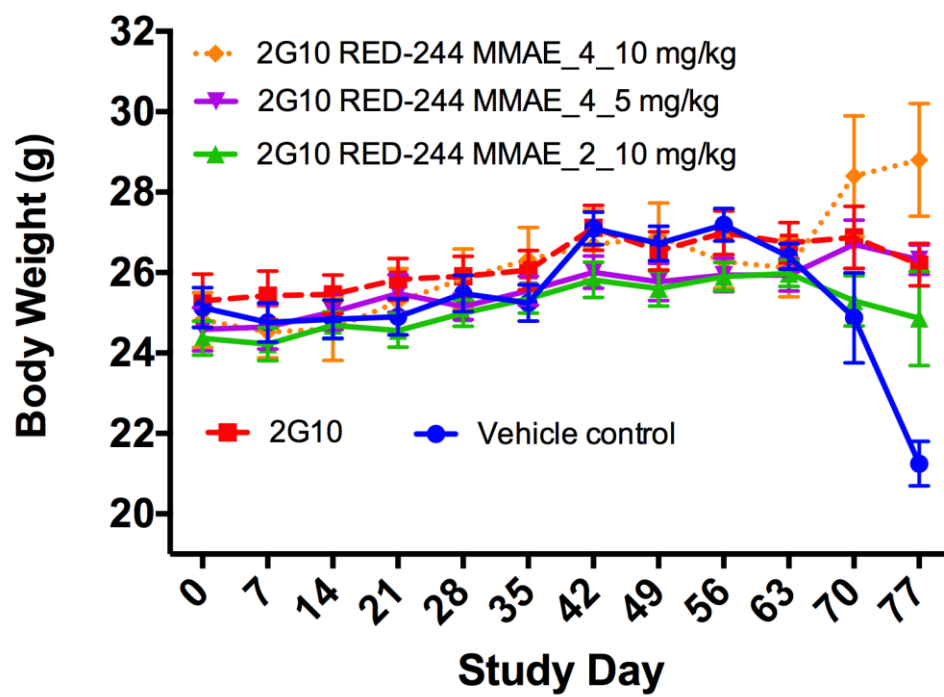

(b)

**Figure S1.** Mouse body weights with various ADC treatments. Methods for xenograft and ADC treatments are as described in the Methods, section 2.9. Figures A and B are from two different cohorts.
